# Supplementary material for: Farming on Mars: Treatment of basaltic regolith soil and briny water simulants sustains plant growth
Source: PLoS One. 2022 Aug 17;17(8):e0272209. doi: 10.1371/journal.pone.0272209 (PMC9385024; doi:10.1371/journal.pone.0272209)
Supplement: S4 Table — (XLSX) [file pone.0272209.s004.xlsx]

## Sheet: Sheet1
Fig 6C	Salinity (PSU)
Replicate	Briny water	Unfiltered water	Filtered water
1	20	10	1
2	44	36	2.3
3	28	10	5.5
4	36	32	2
5	32	22	3.7
Average	32	22	2.9
SE	4	5.4	0.78
Fig. 6D	Electrical conductivity (mS/cm)
Replicate	Briny water	unfiltered water	Filtered water
1	35	23	1.7
2	63	47	7.6
3	35	20	5
4	63	55	6
5	49	30	2.1
Average	49	35	4.48
SE	6.2	6.8	1.13
Fig. 6E	Salinity (PSU)
Replicate	Deionized water	Fresh water
1	0.055	0.298
2	0.063	0.363
3	0.068	0.32
Average	0.062	0.327
SE	0.003	0.01
Fig. 6F	EC (uS/cm)
Replicate	Deionized water	Fresh water
1	4.95	530
2	5.51	550
3	7.21	630
Average	5.89	570
SE	0.67	30
