# Supplementary material for: Farming on Mars: Treatment of basaltic regolith soil and briny water simulants sustains plant growth
Source: PLoS One. 2022 Aug 17;17(8):e0272209. doi: 10.1371/journal.pone.0272209 (PMC9385024; doi:10.1371/journal.pone.0272209)
Supplement: S5 Table — (XLSX) [file pone.0272209.s005.xlsx]

## Sheet: Sheet1
Fig. 7B	Dry weight of plants (mg)
Replicate	Fresh water	Unfiltered water	Filtered water
1	15	3	9
2	39	14	30
3	13	2	12
4	48	4	40
5	18	4	11
Average	26.6	5.4	20.4
SE	7	2.1	6.1
Fig. 7D	Fresh weight of bulbs (g)
Replicate	Fresh water	Unfiltered water	Filtered water
1	8	0.6	8
2	6	0.5	24
3	6	4	10
4	27	0.4	19
5	8	0.6	9
Average	11	1.22	14
SE	4	0.69	3.1
